# Supplementary material
Source: Springer Nature journal article supplement (https://www.springermedizin.de/resource/supplementary/40478_2013_77_MOESM1_ESM.pdf/25658106)

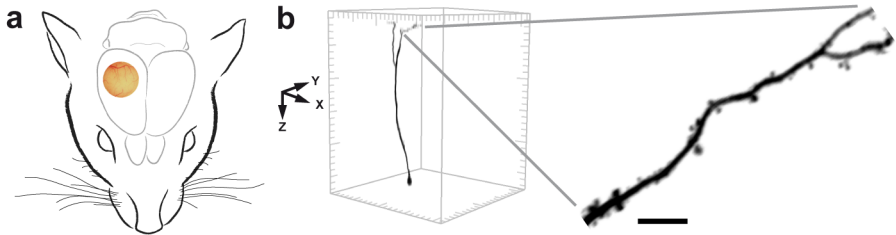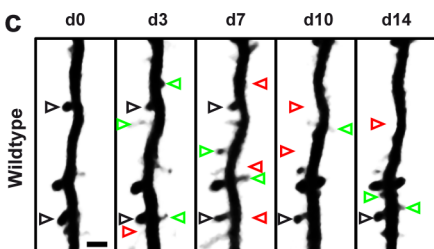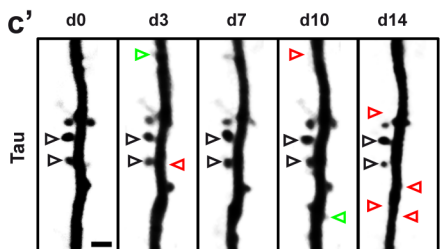

**d** Spine Density / Animal

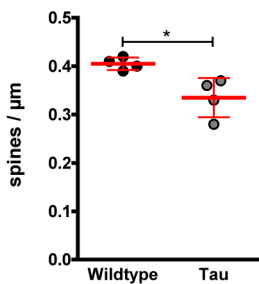

**e** Spine Density / Time

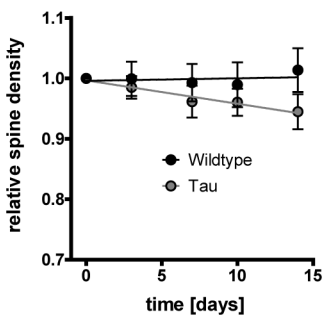

**f** Persistent Spines

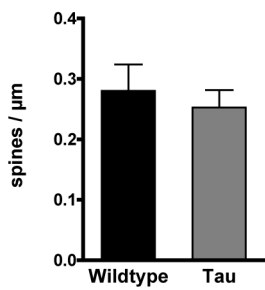

**g** Lost Spines

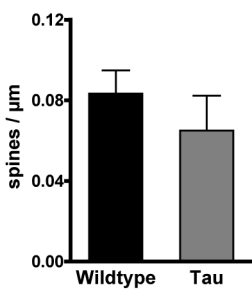

**h** Gained Spines

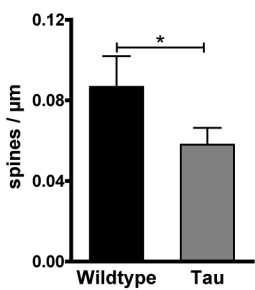

Supplement: MOESM1 [file 25658106]
